# Supplementary material for: Partner independent fusion gene detection by multiplexed CRISPR-Cas9 enrichment and long read nanopore sequencing
Source: PubMed Central journal article supplement (PMC7275081; doi:10.1038/s41467-020-16641-7), 2020-06-05
Supplement: 41467_2020_16641_MOESM2_ESM.pdf [file 41467_2020_16641_MOESM2_ESM.pdf]

## Supplementary Figures to:

### Partner independent fusion gene detection by multiplexed CRISPR/Cas9 enrichment and long-read Nanopore sequencing

Christina Stangl<sup>1,2,3</sup>, Sam de Blank<sup>1</sup>, Ivo Renkens<sup>1</sup>, Liset Westera<sup>4,5</sup>, Tamara Verbeek<sup>1</sup>, Jose Espejo Valle-Inclan<sup>1,3</sup>, Rocio Chamorro González<sup>6,7</sup>, Anton G. Henssen<sup>6,7,8,9</sup>, Markus J. van Roosmalen<sup>3,4</sup>, Ronald W. Stam<sup>4</sup>, Emile E. Voest<sup>2,3</sup>, Wigard P. Kloosterman<sup>1,10,11</sup>, Gijs van Haafden<sup>1+</sup> and Glen Monroe<sup>1+\$</sup>

#### Affiliations

<sup>1</sup> Department of Genetics, Center for Molecular Medicine, University Medical Center Utrecht and Utrecht University, Utrecht, The Netherlands

<sup>2</sup> Division of Molecular Oncology, Netherlands Cancer Institute, Plesmanlaan, Amsterdam, The Netherlands

<sup>3</sup> OncoCode Institute

<sup>4</sup> Princess Máxima Center for Pediatric Oncology, The Netherlands

<sup>5</sup> Dutch Childhood Oncology Group (DCOG), The Netherlands

<sup>6</sup> Department of Pediatric Oncology/Hematology, Charité-Universitätsmedizin Berlin, Germany

<sup>7</sup> Experimental and Clinical Research Center (ECRC) of the MDC and Charité Berlin, Berlin, Germany

<sup>8</sup> German Cancer Consortium (DKTK), Partner Site Berlin, and German Cancer Research Center (DKFZ), Heidelberg, Germany

<sup>9</sup> Berlin Institute of Health, Berlin, Germany

<sup>10</sup> Cyclomics, Utrecht, The Netherlands

<sup>11</sup> Frame Cancer Therapeutics, Amsterdam, The Netherlands

+ These authors jointly supervised this work

\$ Corresponding Author

Corresponding Author email address: g.monroe@umcutrecht.nl

**Keywords:** Fusion Genes, Targeted Enrichment, Nanopore Sequencing

A

3' unknown sequence

5' ATG.....AGGATGCTCCATGCTAGCTAGCGGCTAGGCTAGGGACTAATC 3'

3' TAC.....TCCTACGAGGTACGATCGATCGCCGATCCGATCCCTGATTAG 5'

crRNA sequence: 5'TGCTAGCTAGCGGCTAGGCT3'

Read direction: Downstream

B

5' unknown sequence

5' ATG.....AGGATGCTCCATGCTAGCTAGCGGCTAGGCTAGGGACTAATC 3'

3' TAC.....TCCTACGAGGTACGATCGATCGCCGATCCGATCCCTGATTAG 5'

crRNA sequence: 5'AGCCTAGCCGCTAGCTAGCA3'

Read direction: Upstream

Supplementary Figure 1:

Examples of crRNA design for directional sequencing are shown. **(A)** crRNAs (grey) are designed containing the sequence of the forward strand of the target gene 20 bp prior to a PAM-sequence (NGG, red underlined) if the unknown gene partner is downstream (3') of the known target sequence. **(B)** crRNAs (grey) are designed containing the sequence of the reverse strand of the target gene 20 bp prior to a PAM-sequence (NGG, red underlined) if the unknown gene partner is upstream (5') of the known target sequence.

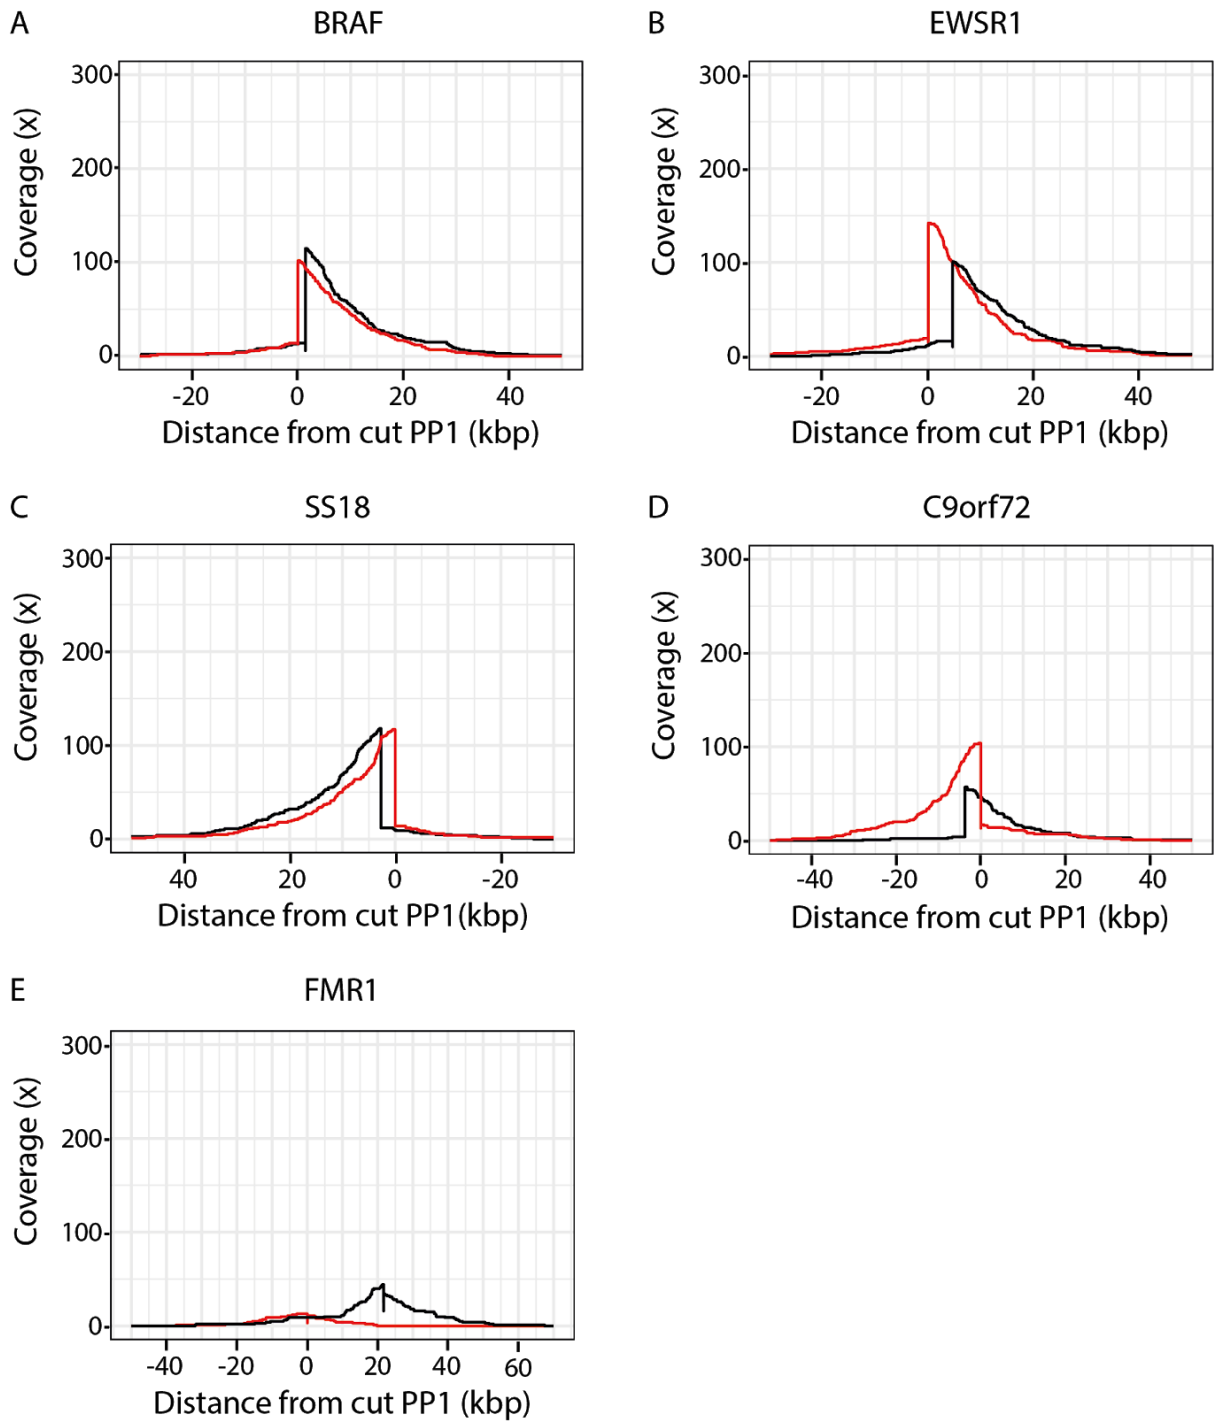

Supplementary Figure 2:

(A-E) Coverage plots showing deconvoluted on-target coverage across multiple genomic loci for two different cut positions (red = PP1 and black = PP2).

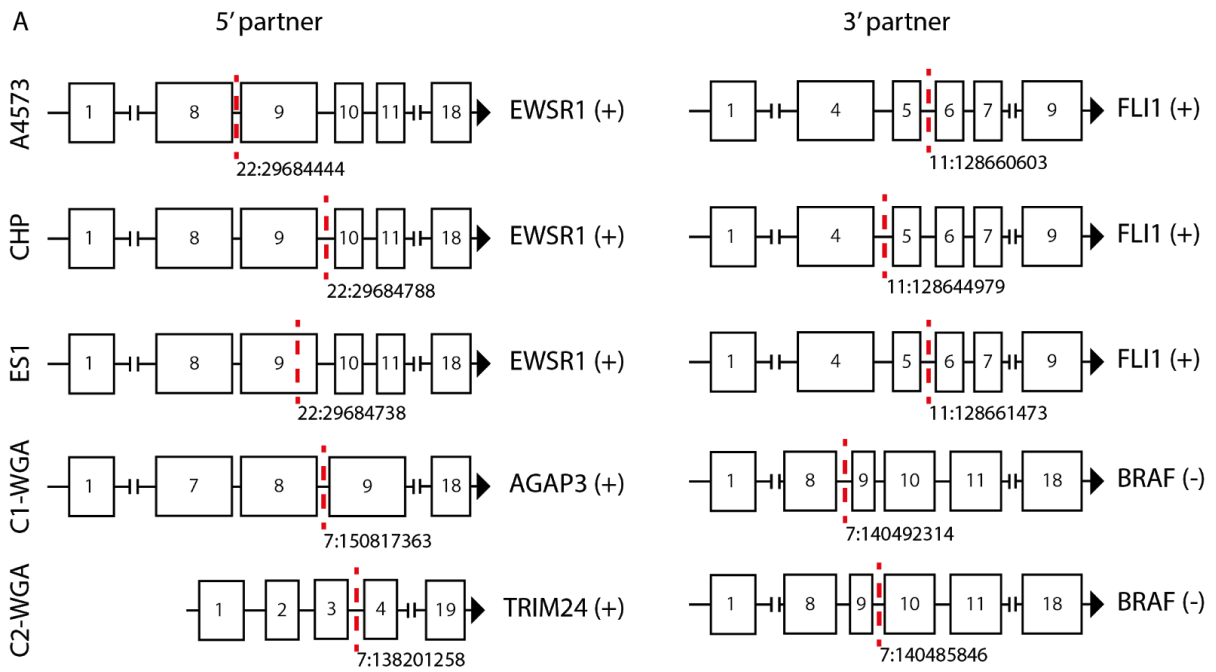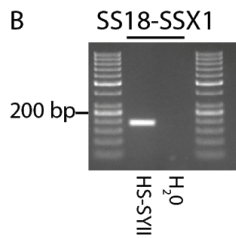

**Supplementary Figure 3:**

(A) Fusion gene configurations for the identified *EWSR1-FLI1*, *AGAP3-BRAF* and *TRIM24-BRAF* fusion genes. (+) or (-) indicate genomic location on the forward or reverse strand of the gene, respectively. Dashed lines (red) indicate break-position for each sample. (B) Breakpoint PCR (n=1) for the *SS18-SSX1* fusion gene in the HS-SYII cell line.

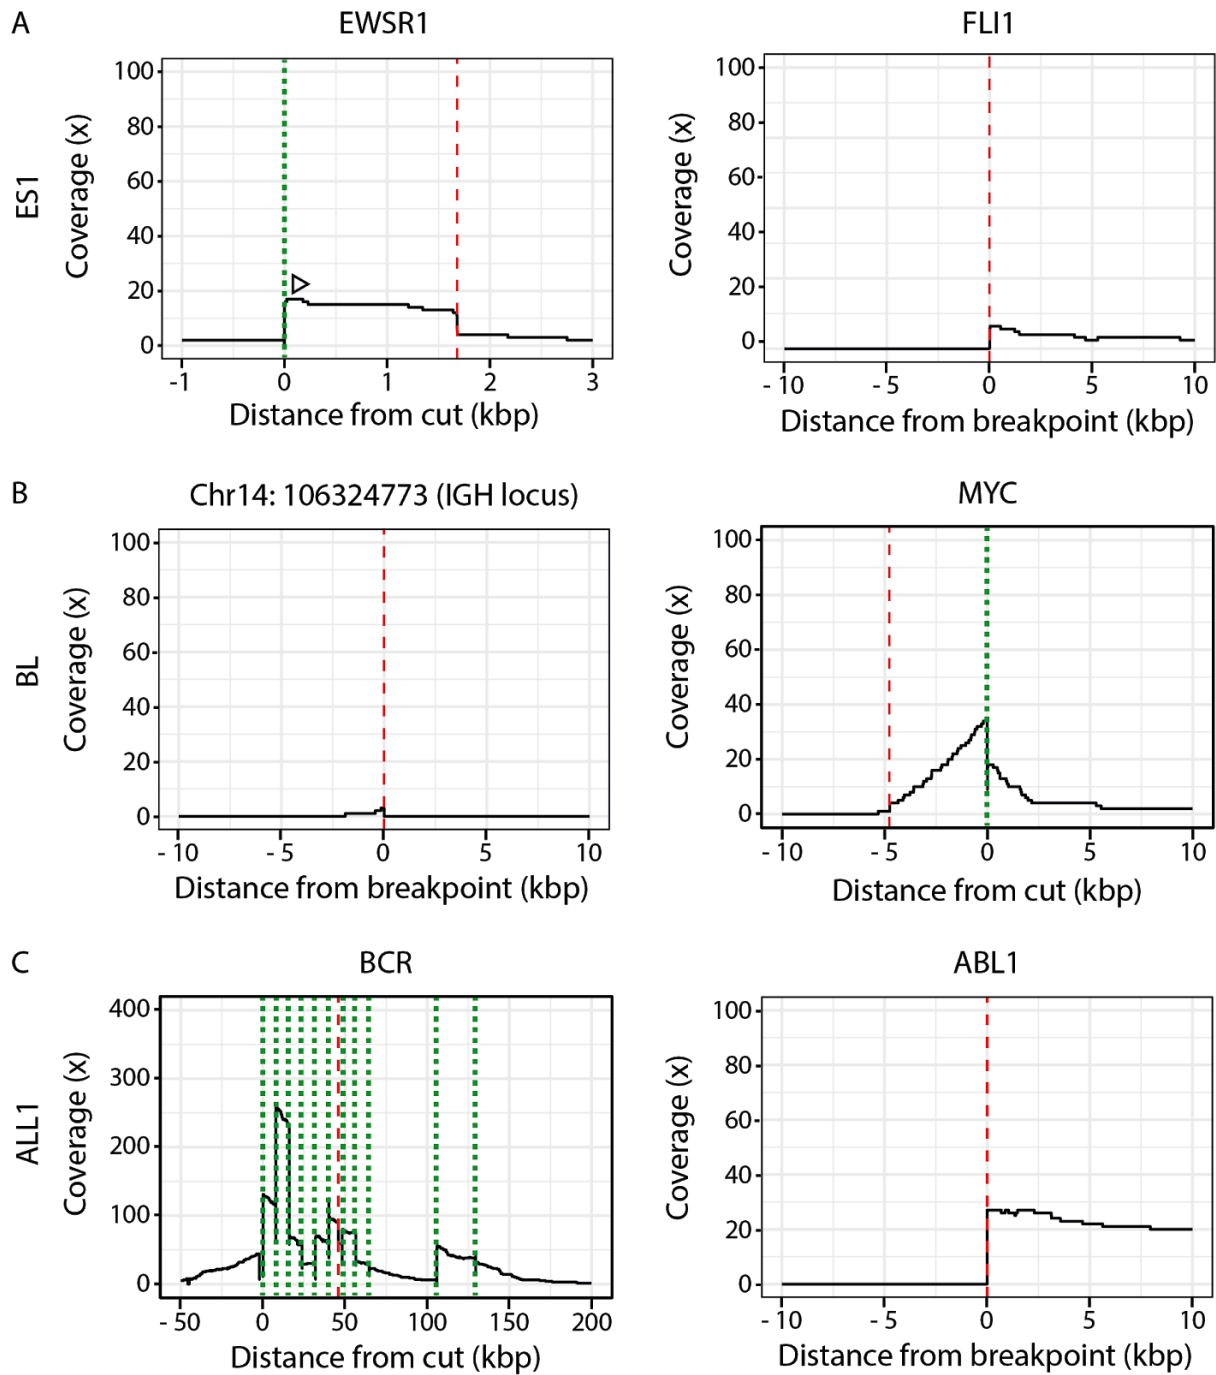

Supplementary Figure 4:

Coverage plots for the (A) ES1 tumor sample for the two fusion partners *EWSR1* (targeted) and *FLI1*, (B) BL tumor sample the *MYC* gene (targeted) and IGH locus, and (C) for the ALL1 sample for the two fusion partners *BCR* (targeted) and *ABL1*. Dotted lines (green) indicate cut position, dashed lines (red) indicate breakpoint positions and arrows indicate the desired read direction.

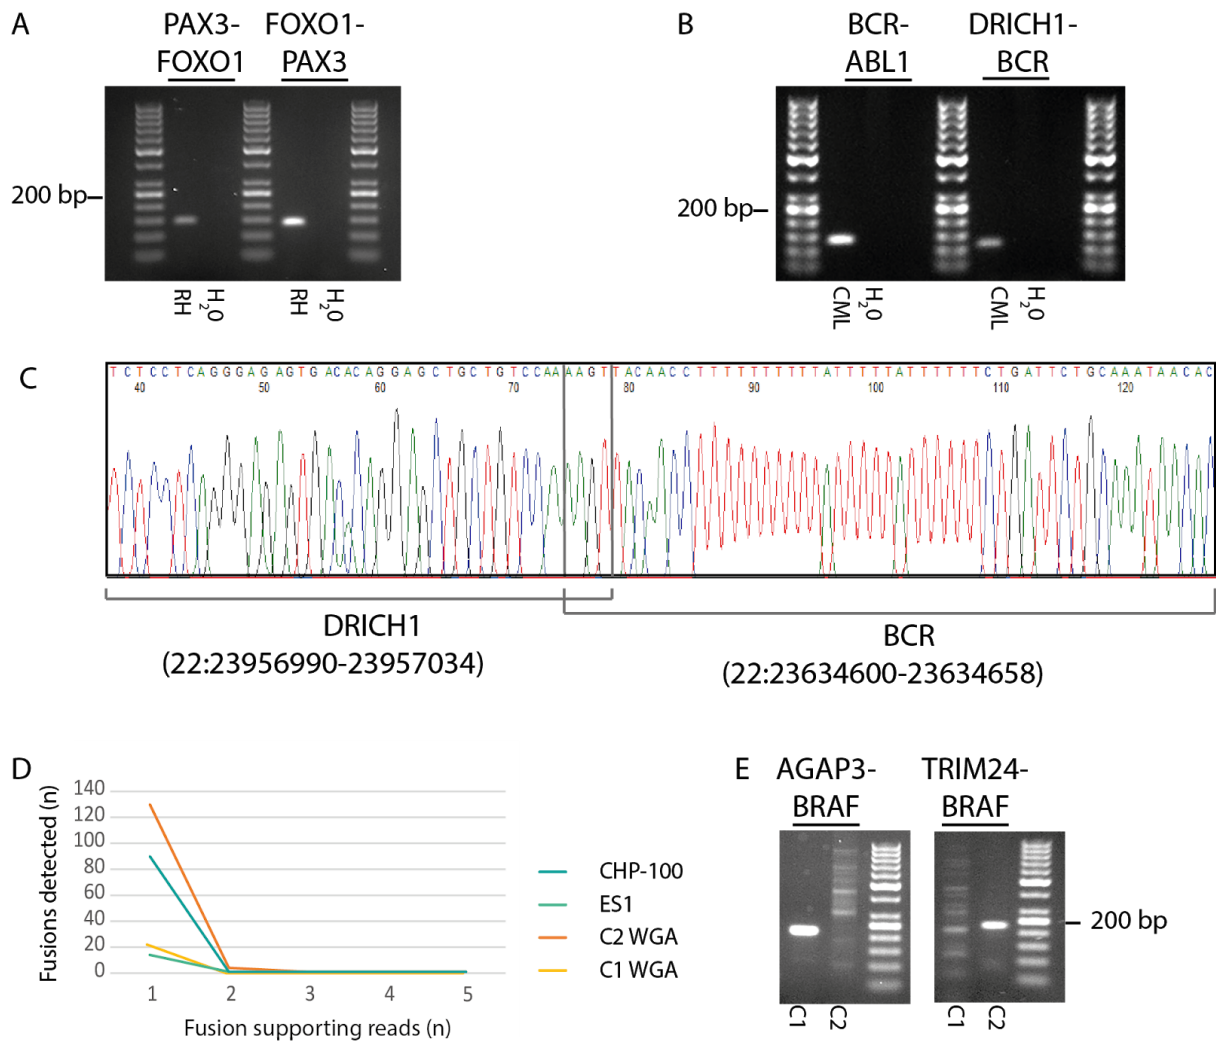

**Supplementary Figure 5:**

(A) Breakpoint PCR (n=1) for the reciprocal *PAX3-FOXO1* and *FOXO1-PAX3* fusion genes in the RH tumor sample. (B) Breakpoint PCR (n=1) for the *BCR-ABL1* and *DRICH1-BCR* fusions in the CML tumor sample. (C) Sanger sequencing trace for the *DRICH1-BCR* fusion gene identified in the CML sample. (D) Graph depicting the number of fusion genes called by NanoFG depending on the set threshold of fusion-supporting reads (n=1-5) for the samples CHP-100, ES1, C1-WGA and C2-WGA. (E) Breakpoint PCR (n=1) for the *AGAP3-BRAF* and *TRIM24-BRAF* fusion genes in the non-amplified tumor material of C1 and C2.

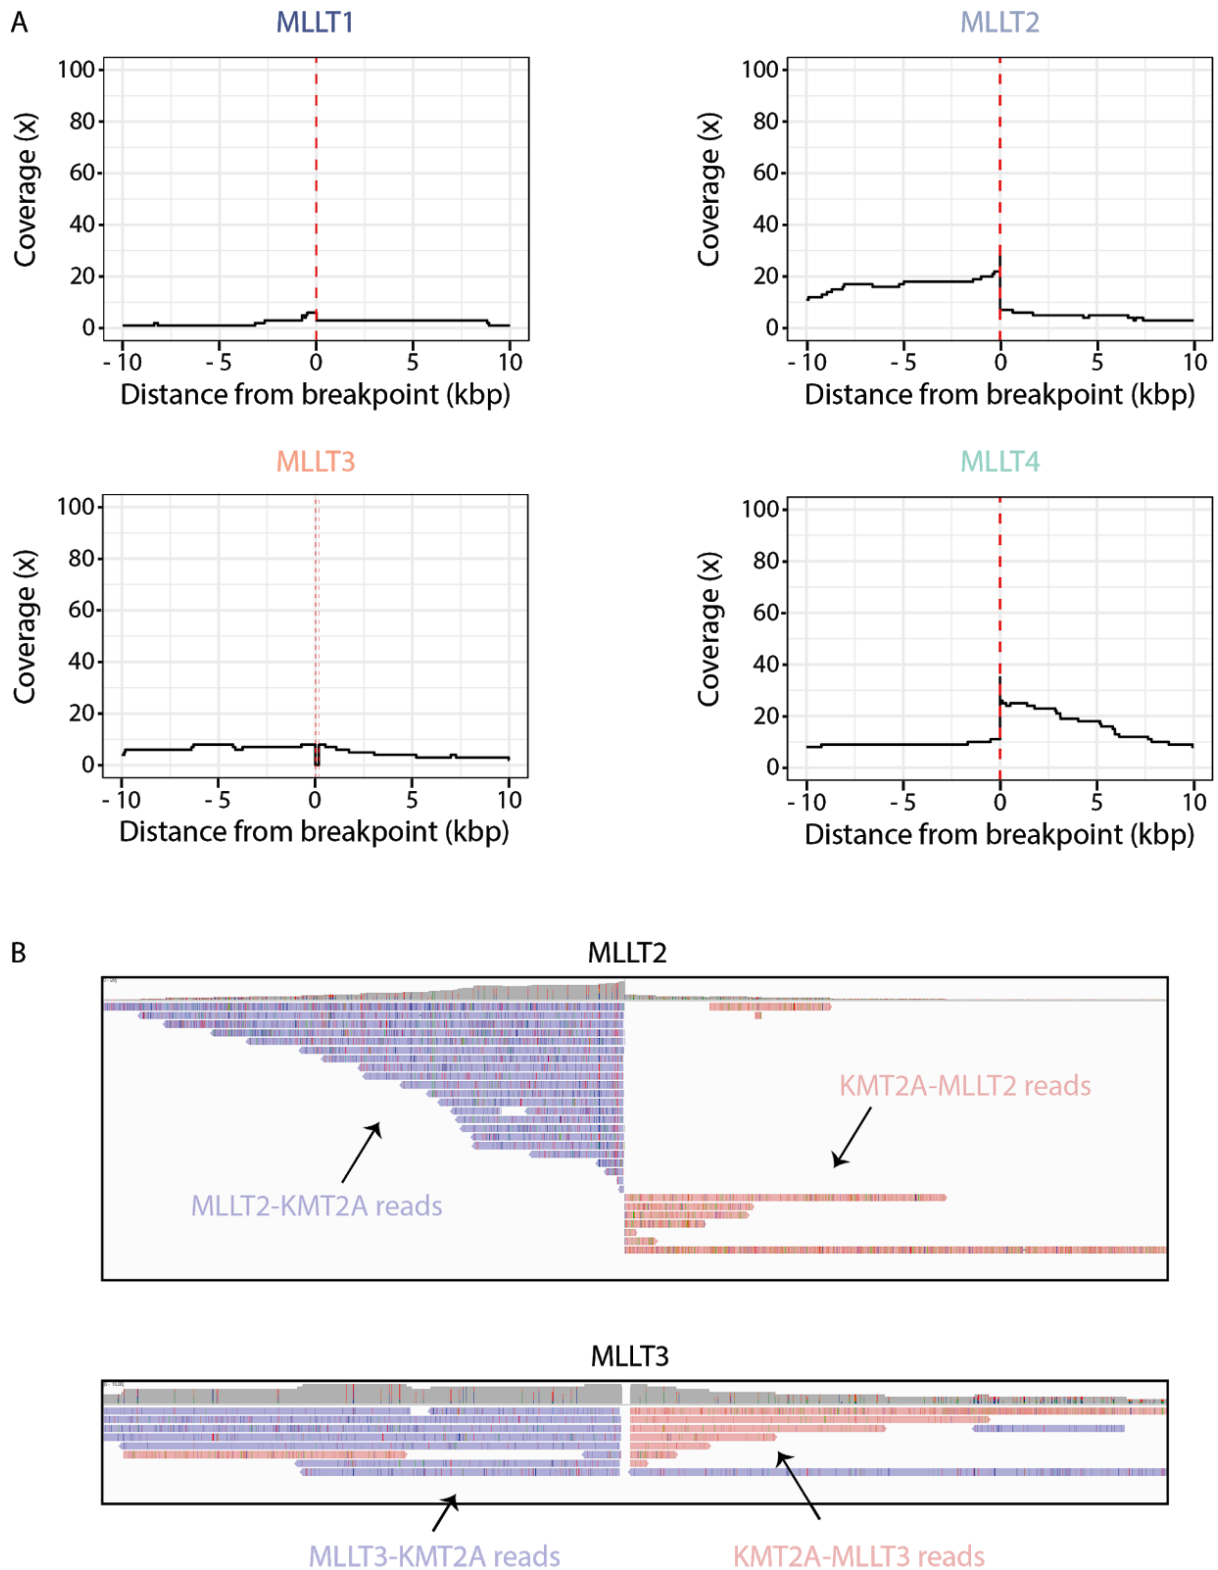

**Supplementary Figure 6:**

(A) Coverage plots for the *KMT2A* fusion partners *MLLT1*, *MLLT2*, *MLLT3* and *MLLT4*. Dashed lines (red) indicate breakpoint positions. (B) IGV screenshot showing reads identifying the *KMT2A-MLLT2* and *KMT2A-MLLT3* fusion genes (red) and their reciprocal translocations (blue).

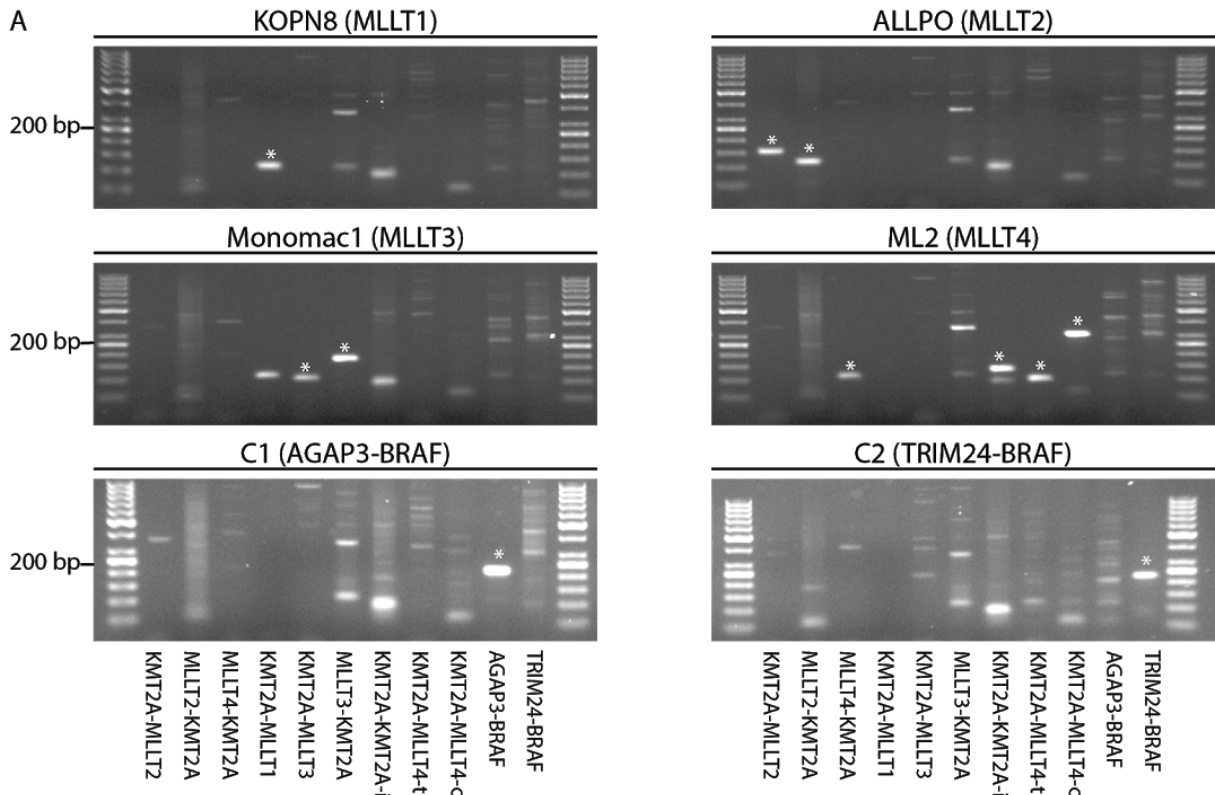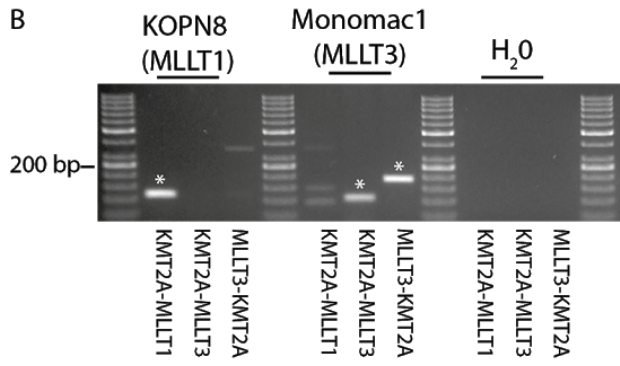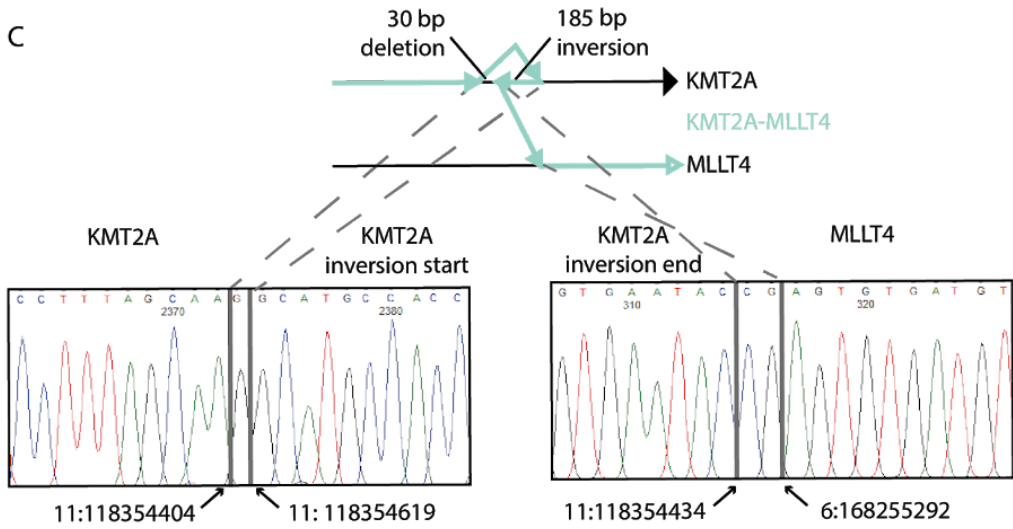



Supplementary Figure 7:

(A) Breakpoint PCR (n=1) with the fusion-specific breakpoint primers for the cell lines KOPN8 (*MLLT1*), ALLPO (*MLLT2*), Monomac-1 (*MLLT3*), ML2 (*MLLT4*) and the tumor samples C1 (*AGAP3-BRAF*) and C2 (*TRIM24-BRAF*). \* indicates the bands at the correct height in the correct sample. For the complex *KMT2A-MLLT4* fusion, primers that span the inversion (*KMT2A-MLLT4-i*), translocation (*KMT2A-MLLT4-t*) and the complete rearrangement (*KMT2A-MLLT4-c*) were tested.

(B) Breakpoint PCR (n=1) for the KOPN8 and freshly isolated Monomac-1 cell lines for the *MLLT1* and *MLLT3* fusion genes. Asterisk indicates the bands at the correct height in the correct sample.

(C) Schematic of rearranged *KMT2A-MLLT4* fusion gene. Sanger-traces showing the exact breakpoints (vertical lines) and breakpoint-positions. The discordant nucleotides between breakpoints (“G” between *KMT2A/KMT2A* inversion; “CG” between *KMT2A* inversion/*MLLT4*) were most likely introduced during non-homologous end joining.

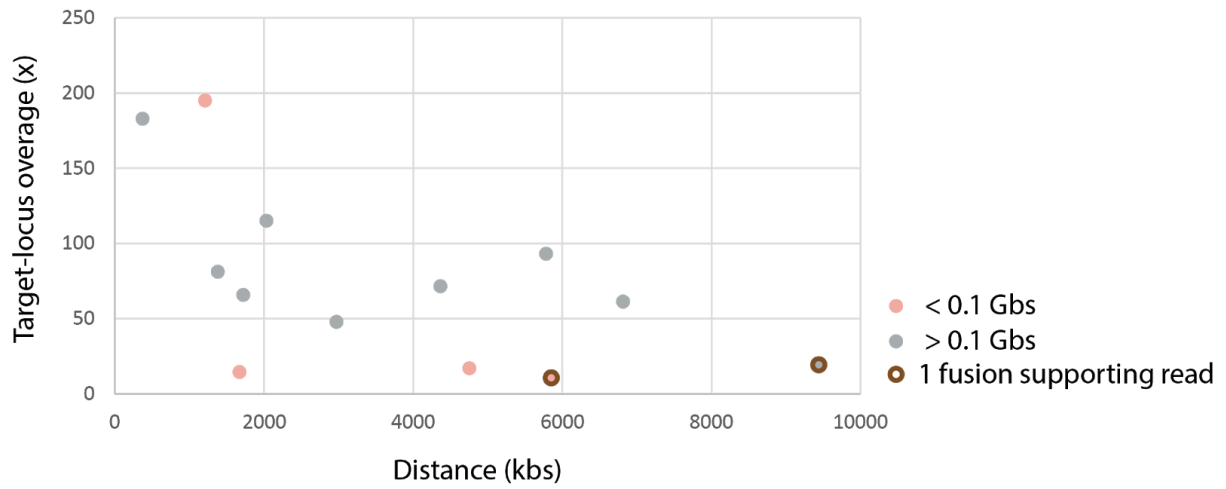

Supplementary Figure 8:

Plot depicting the relationship between coverage at the target-locus, distance between the cut and the breakpoint, and sequencing throughput. Samples are highlighted according to <0.1 Gbs (red) or >0.1 Gbs (grey) throughput. Samples with one fusion supporting read are circled in brown.
