# Supplementary material for: Partner independent fusion gene detection by multiplexed CRISPR-Cas9 enrichment and long read nanopore sequencing
Source: PubMed Central journal article supplement (PMC7275081; doi:10.1038/s41467-020-16641-7), 2020-06-05
Supplement: 41467_2020_16641_MOESM5_ESM.pdf [file 41467_2020_16641_MOESM5_ESM.pdf]

**Title:** Supplementary Data 1

**Description:** Sequencing information for each sample included in this study, including coverage and enrichment values and breakpoint location and sequence.
